# Supplementary material for: Cellulose nanofiber-based electrode as a component of an enzyme-catalyzed biofuel cell
Source: Royal Society of Chemistry journal article supplement (doi:10.1039/d0ra03476b), 2020-01-01
Supplement: d0ra03476b1.pdf [file d0ra03476b1.pdf]

Electronic Supplementary Information (ESI)

## **Cellulose nanofiber-based electrode as a component of an enzyme-catalyzed biofuel cell**

Masato Tominaga<sup>\*a</sup>, Kazufumi Kuwahara<sup>a</sup>, Masayuki Tsushida<sup>b</sup> and Kenji Shida<sup>b</sup>

<sup>a</sup> Department of Chemistry and Applied Chemistry, Saga University, Japan.

<sup>b</sup> Faculty of Engineering, Kumamoto University, Japan.

Corresponding authors:

Masato Tominaga

*Department of Chemistry and Applied Chemistry, Saga University, Japan.*

Email: masato@cc.saga-u.ac.jp

Tel/Fax: +81-96-342-3655

## Experimental

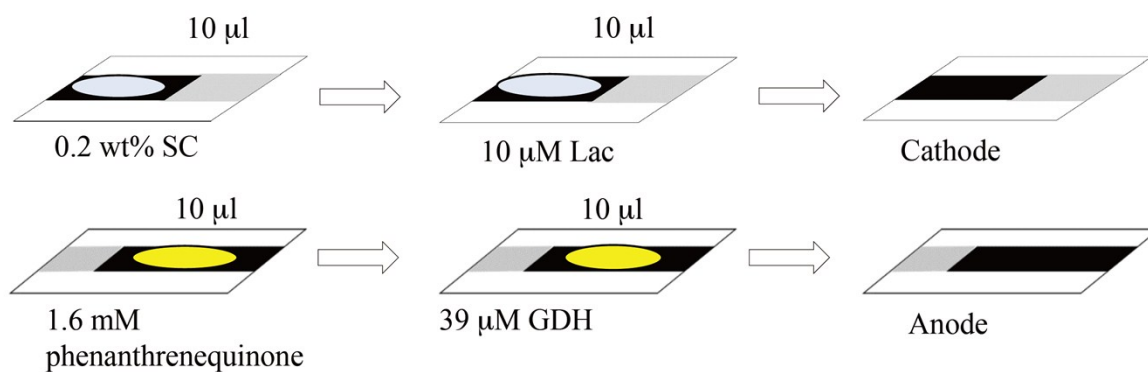

**Scheme S1.** Schematic illustration of anode and cathode preparations for the enzyme-catalyzed biofuel cell.

## Results and discussion

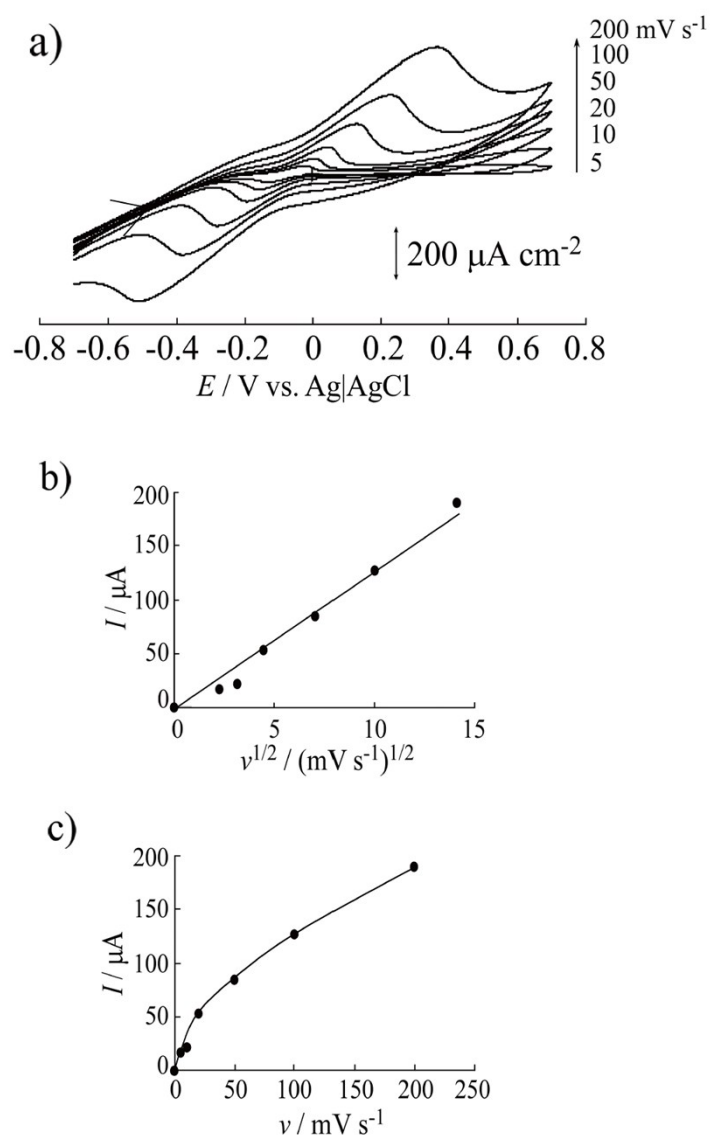

**Figure S1.** Cyclic voltammograms for the 9,10-phenanthrenequinone-modified MWCNT/CNF sheet in  $0.1 \text{ mol dm}^{-3}$  acetate buffer solution (pH 5) at various potential sweep rates (a). Plots of the cathodic peak current versus the square root of the potential sweep rate (b) and versus the potential sweep rate (c). The 9,10-phenanthrenequinone-modified MWCNT/CNF sheet was prepared by simple drop-casting of  $30 \mu\text{L}$  of a  $1.6 \text{ mmol dm}^{-3}$  ethanol solution of 9,10-phenanthrenequinone.
